# Supplementary material
Source: publisher figshare collection journal article supplement (https://diabetesjournals.figshare.com/ndownloader/files/28693740)
Supplement: Supplementary file 1 [file 28693740]

## Supplementary Material

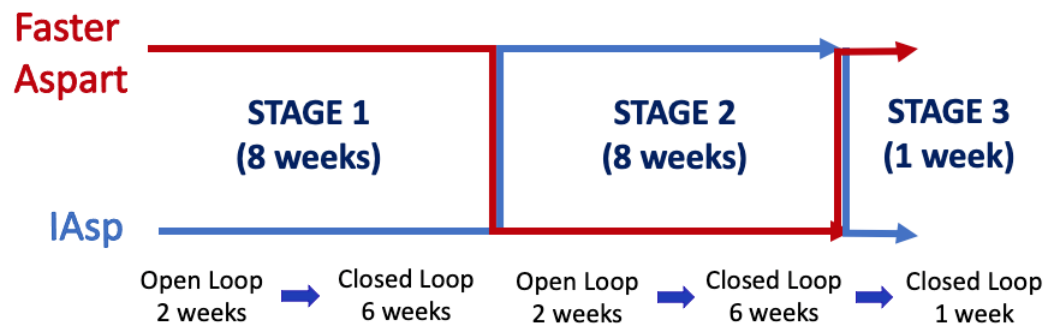

Supplementary Figure S1: Study Design

## CONSORT Flow Diagram

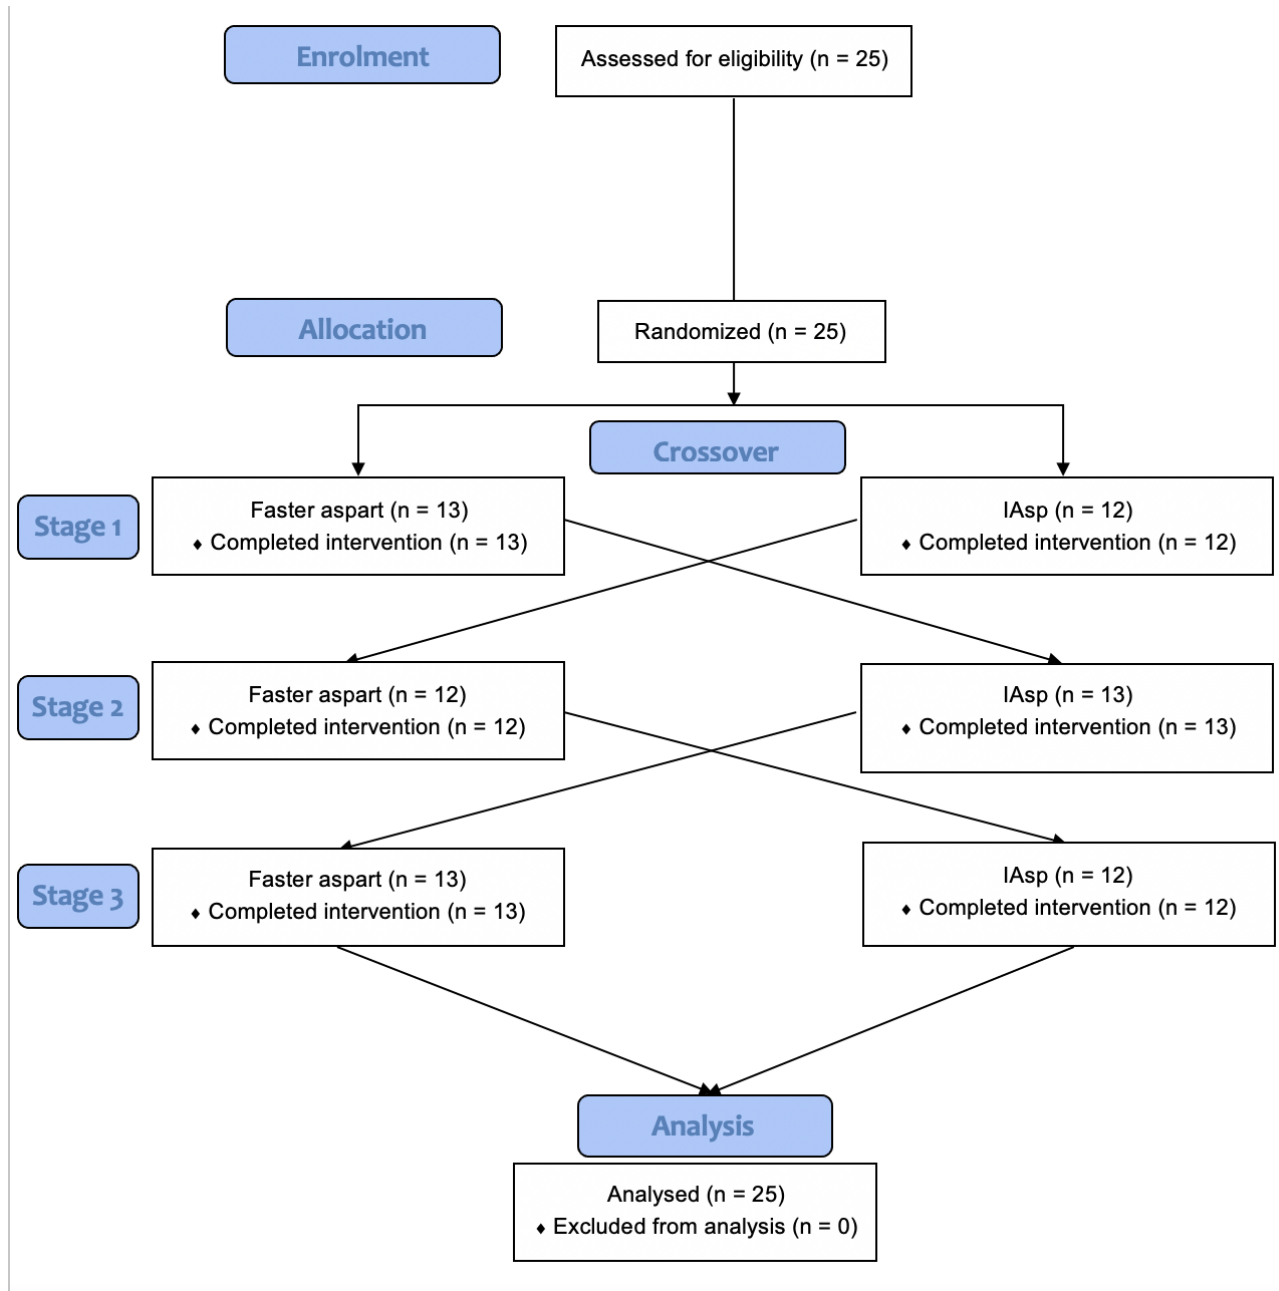

Supplementary Figure S2: CONSORT participant flow diagram

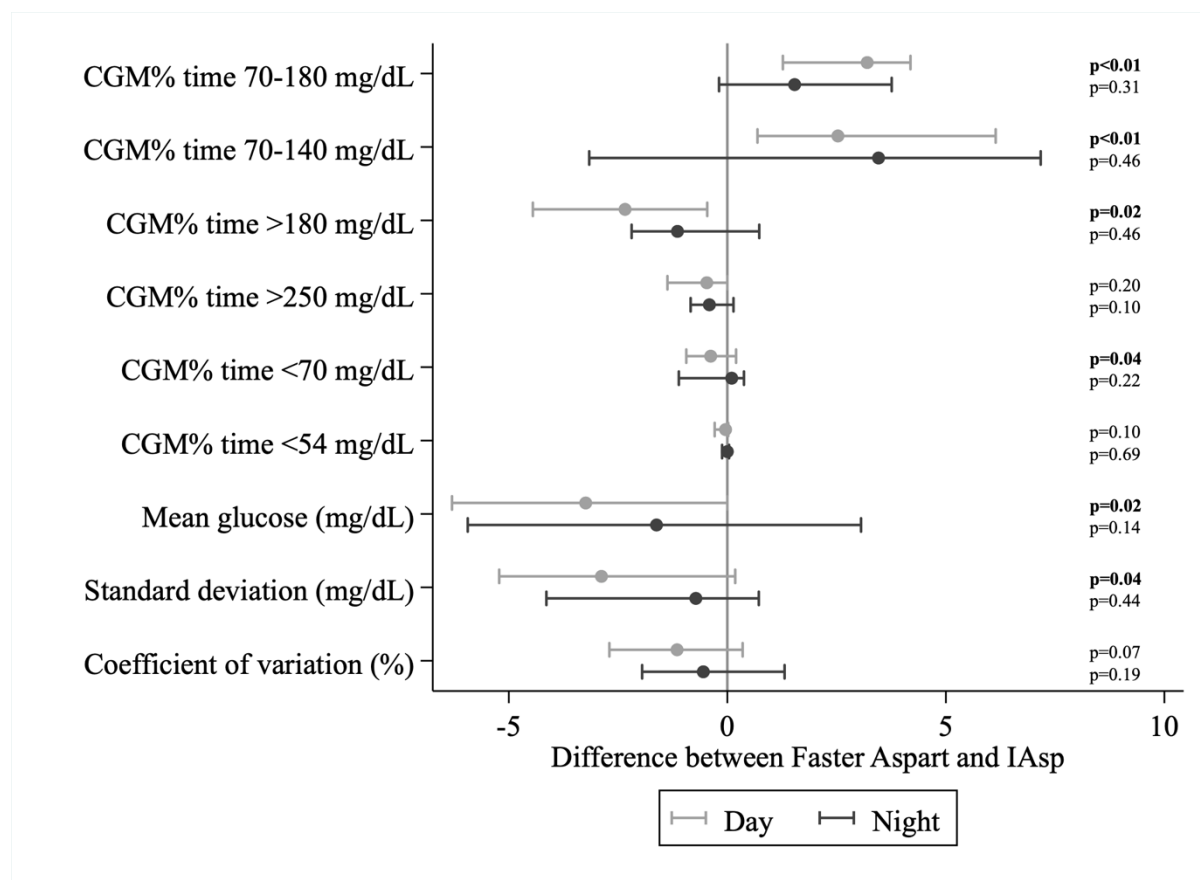

**Supplementary Figure S3: Analysis of CGM outcomes by day (06:00-23:59) vs. night (00:00-05:59)**

Forest plot of differences in CGM metrics between faster aspart and IAsp groups; presented by time of day (Day, grey; Night, black).

Lines represent median difference and 95% CI

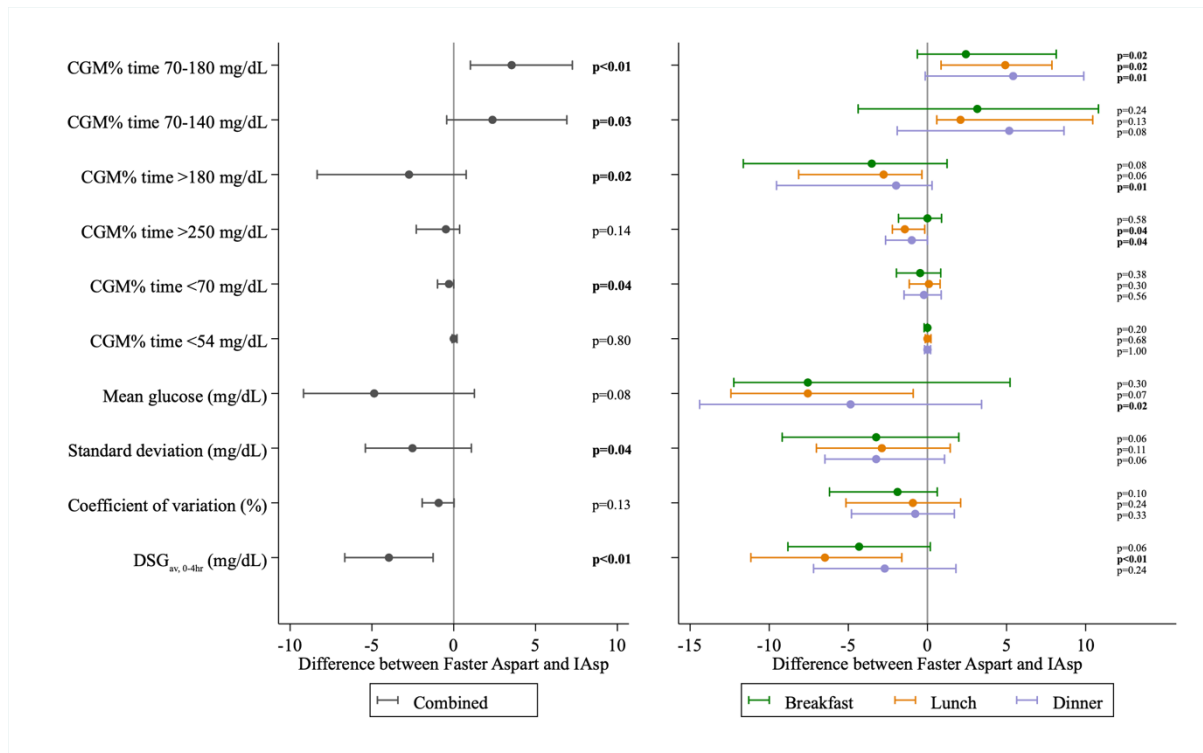

### Supplementary Figure S4: Analysis of CGM outcomes over the 4-hour postprandial period

Forest plot of differences in CGM metrics between faster aspart and IAsp groups; presented as combined all meals (Grey line); and individual meal periods (Breakfast, green; Lunch, orange; Dinner, purple).

Lines represent median difference and 95% CI

$\Delta SG_{av, 0-4hr}$  was calculated as  $AUC_{glucose, 0-4hr} / 4hr - SG_{pre-meal}$ , where  $AUC_{glucose, 0-4hr}$  was the area under the glucose concentration-time profile between 0 and 4 hours, and  $SG_{pre-meal}$  was the sensor glucose concentration immediately before meal commencement.

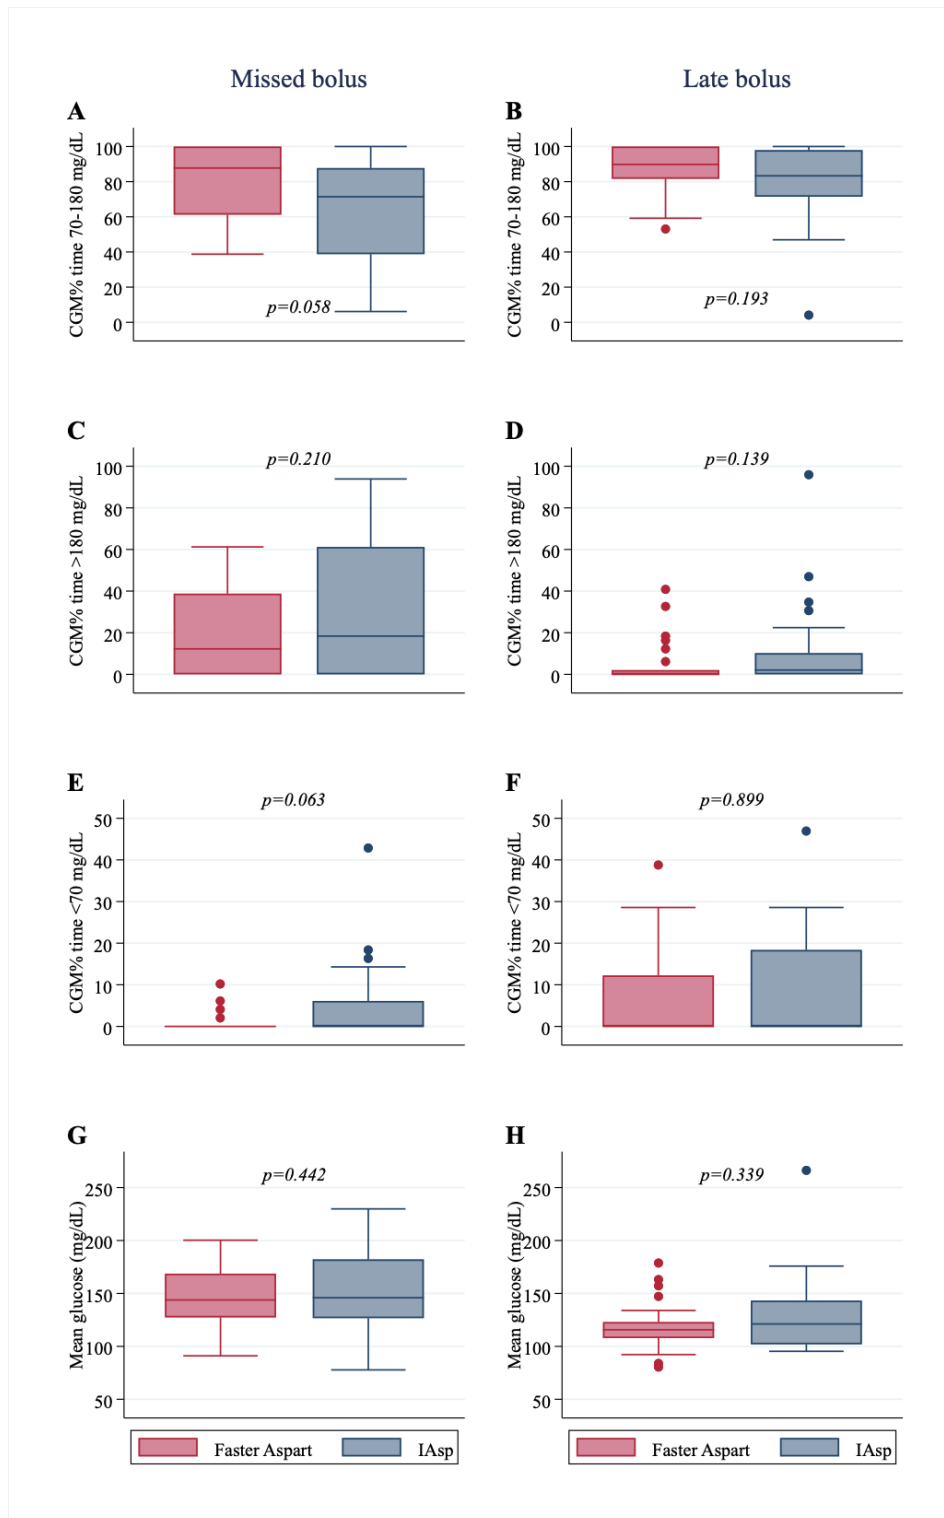

**Supplementary Figure S5: CGM metrics over 4-hours following a standardized missed and late meal bolus**

Boxplots represent CGM metrics: % time 70-180mg/dL (A and B); % time >180mg/dL (C and D); % time <70mg/dL (E and F); mean sensor glucose (mg/dL) (G and H).

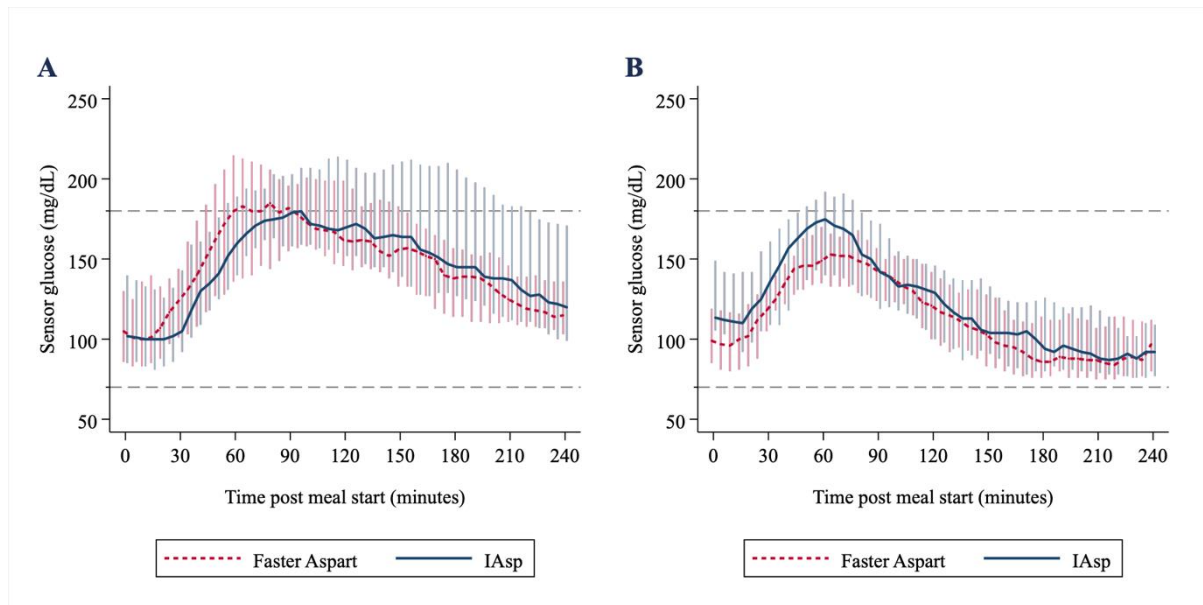

**Supplementary Figure S6: Sensor glucose over 4-hours following a standardized (A) missed and (B) late meal bolus**

Faster aspart (red) and IAsp (blue) lines represent median values; and vertical bars represent IQRs.

| <b>Baseline characteristics</b>                                             | <b><i>n</i> = 25</b>         |
|-----------------------------------------------------------------------------|------------------------------|
| Age (years)                                                                 | 48 (37, 57)                  |
| Sex (male)                                                                  | 13 (52%)                     |
| BMI (kg/m <sup>2</sup> )                                                    | 28 (26, 30)                  |
| Duration of diabetes (years)                                                | 26 (13, 38)                  |
| Duration of insulin pump therapy (years)                                    | 8 (3, 15)                    |
| HbA <sub>1c</sub> (%)                                                       | 7.0 (6.6, 7.2)               |
| HbA <sub>1c</sub> (mmol/mol)                                                | 53 (49, 55)                  |
| eGFR (mL/min/1.73m <sup>2</sup> )                                           | 90 (80, 90)                  |
| Total daily insulin dose (units/day)                                        | 44 (35, 62)                  |
| Insulin requirements (units/kg)                                             | 0.5 (0.4, 0.7)               |
| Insulin formulation used at study entry.<br>Aspart   Faster aspart   Lispro | 17 (68%)   5 (20%)   3 (12%) |
| Hypoglycemia awareness (Gold Score)                                         | 2 (2, 3)                     |
| History of microvascular complications                                      | 7 (28%)                      |
| History of macrovascular complications                                      | 1 (4%)                       |

**Supplementary Table S1: Clinical Characteristics of Study Participants.**

Continuous data are presented as median (IQR). Categorical data are presented as frequency (%). BMI, body mass index.

|                      | Faster aspart ( <i>n</i> = 25) | IAsp ( <i>n</i> = 25) | Difference (95% CI) | <i>p</i> value |
|----------------------|--------------------------------|-----------------------|---------------------|----------------|
| Missed meal bolus    |                                |                       |                     |                |
| % time 70-180mg/dL   | 87.8 (61.2, 100.0)             | 71.4 (38.8, 87.8)     | 18.4 (-6.1, 32.7)   | 0.06           |
| % time 70-140mg/dL   | 53.1 (26.5, 59.2)              | 42.9 (14.3, 55.1)     | 2.0 (-6.1, 18.4)    | 0.37           |
| % time >180mg/dL     | 12.2 (0.0, 38.8)               | 18.4 (0.0, 61.2)      | 0.0 (-24.5, 6.1)    | 0.20           |
| % time >250mg/dL     | 0.0 (0.0, 0.0)                 | 0.0 (0.0, 0.0)        | 0.0 (0.0, 0.0)      | 1              |
| % time <70mg/dL      | 0.0 (0.0, 0.0)                 | 0.0 (0.0, 6.1)        | 0.0 (0.0, 0.0)      | 0.06           |
| % time <54mg/dL      | 0.0 (0.0, 0.0)                 | 0.0 (0.0, 0.0)        | 0.0 (0.0, 0.0)      | 1              |
| Mean glucose (mg/dL) | 143.8 (127.3, 168.7)           | 146.0 (126.7, 182.2)  | -10.1 (-31.9, 24.8) | 0.44           |
| Glucose SD (mg/dL)   | 31.7 (23.9, 39.4)              | 30.0 (21.4, 41.9)     | -0.5 (-6.3, 6.7)    | 0.77           |
| Glucose CV (%)       | 22.0 (17.1, 25.9)              | 22.8 (15.9, 24.5)     | 3.0 (-3.2, 5.7)     | 0.51           |
| Late meal bolus      |                                |                       |                     |                |
| % time 70-180mg/dL   | 89.8 (81.6, 100.0)             | 83.3 (71.4, 98.0)     | 2.0 (-6.1, 18.4)    | 0.19           |
| % time 70-140mg/dL   | 67.4 (57.1, 77.6)              | 53.1 (42.9, 79.6)     | 18.4 (-6.1, 24.5)   | 0.14           |
| % time >180mg/dL     | 0.0 (0.0, 2.0)                 | 2.0 (0.0, 10.2)       | 0.0 (-6.3, 0.0)     | 0.14           |
| % time >250mg/dL     | 0.0 (0.0, 0.0)                 | 0.0 (0.0, 0.0)        | 0.0 (0.0, 0.0)      | 0.50           |



|                      |                      |                      |                    |      |
|----------------------|----------------------|----------------------|--------------------|------|
| % time <70mg/dL      | 0.0 (0.0, 12.2)      | 0.0 (0.0, 18.4)      | 0.0 (-6.1, 8.2)    | 0.90 |
| % time <54mg/dL      | 0.0 (0.0, 0.0)       | 0.0 (0.0, 0.0)       | 0.0 (0.0, 0.0)     | 0.69 |
| Mean glucose (mg/dL) | 115.7 (107.8, 122.9) | 121.1 (101.9, 143.3) | -7.2 (-29.7, 13.9) | 0.34 |
| Glucose SD (mg/dL)   | 30.1 (20.7, 32.6)    | 34.4 (21.6, 43.2)    | -5.9 (-13.1, 3.6)  | 0.11 |
| Glucose CV (%)       | 24.8 (20.4, 28.7)    | 26.0 (19.6, 34.8)    | -4.1 (-6.2, 4.6)   | 0.31 |

**Supplementary Table S2: CGM outcomes following a missed and late meal bolus**

Results presented as median (IQR), median difference (95% CI), analysis using sign rank test
